# Supplementary material for: Tumour budding-based grading as independent prognostic biomarker in HPV-positive and HPV-negative head and neck cancer
Source: PubMed Central journal article supplement (PMC10241901; doi:10.1038/s41416-023-02240-y), 2023-04-12
Supplement: 41416_2023_2240_MOESM1_ESM.pdf [file 41416_2023_2240_MOESM1_ESM.pdf]

**Supplemental Table S1:** Clinicopathologic characteristics of the TCGA-HNSC cohort.

| Parameter                      | all patients | HPV-negative | HPV-positive | P-value          |
|--------------------------------|--------------|--------------|--------------|------------------|
| <b>Total</b>                   | 331          | 286          | 45           |                  |
| <b>Age</b>                     |              |              |              | <b>.004</b>      |
| <=61                           | 176 (53.2%)  | 143 (81.2%)  | 33 (18.8%)   |                  |
| >61                            | 155 (46.8%)  | 143 (92.3%)  | 12 (7.7%)    |                  |
| <b>Gender</b>                  |              |              |              | <b>.04</b>       |
| Female                         | 85 (25.7%)   | 79 (92.9%)   | 6 (7.1%)     |                  |
| Male                           | 246 (74.3%)  | 207 (84.1%)  | 39 (15.9%)   |                  |
| <b>Smoking</b>                 |              |              |              | .87              |
| Non-Smoker                     | 110 (34.5%)  | 94 (85.5%)   | 16 (14.5%)   |                  |
| Smoker                         | 209 (65.5%)  | 180 (86.1%)  | 29 (13.9%)   |                  |
| NA                             | 12           | 12           | 0            |                  |
| <b>AJCC Stage</b>              |              |              |              | .51              |
| Stage I                        | 15 (4.9%)    | 15 (100%)    | 0 (0%)       |                  |
| Stage II                       | 48 (15.8%)   | 41 (85.4%)   | 7 (14.6%)    |                  |
| Stage III                      | 48 (15.8%)   | 41 (85.4%)   | 7 (14.6%)    |                  |
| Stage IV                       | 193 (63.5%)  | 169 (87.6%)  | 24 (12.4%)   |                  |
| NA                             | 27           | 20           | 7            |                  |
| <b>WHO Grade</b>               |              |              |              | <b>.002</b>      |
| G1                             | 46 (13.9%)   | 45 (97.8%)   | 1 (2.2%)     |                  |
| G2                             | 204 (61.6%)  | 179 (87.7%)  | 25 (12.3%)   |                  |
| G3                             | 81 (24.5%)   | 62 (76.5%)   | 19 (23.5%)   |                  |
| <b>WHO Subtype</b>             |              |              |              | <b>.005</b>      |
| basaloid                       | 24 (7.3%)    | 15 (62.5%)   | 9 (37.5%)    |                  |
| conventional                   | 305 (92.1%)  | 269 (88.2%)  | 36 (11.8%)   |                  |
| papillary                      | 1 (0.3%)     | 1 (100%)     | 0 (0%)       |                  |
| verrucous                      | 1 (0.3%)     | 1 (100%)     | 0 (0%)       |                  |
| <b>Brandwein-Gensler score</b> |              |              |              | .17              |
| low                            | 12 (3.9%)    | 9 (75%)      | 3 (25%)      |                  |
| intermediate                   | 194 (63.2%)  | 173 (89.2%)  | 21 (10.8%)   |                  |
| high                           | 101 (32.9%)  | 85 (84.2%)   | 16 (15.8%)   |                  |
| NA                             | 24           | 19           | 5            |                  |
| <b>pN</b>                      |              |              |              | <b>.03</b>       |
| N0                             | 120 (42%)    | 112 (93.3%)  | 8 (6.7%)     |                  |
| N1/2/3                         | 166 (58%)    | 140 (84.3%)  | 26 (15.7%)   |                  |
| NA                             | 45           | 34           | 11           |                  |
| <b>pT</b>                      |              |              |              | <b>.007</b>      |
| T1/T2                          | 115 (37.1%)  | 93 (80.9%)   | 22 (19.1%)   |                  |
| T3/T4                          | 195 (62.9%)  | 179 (91.8%)  | 16 (8.2%)    |                  |
| NA                             | 21           | 14           | 7            |                  |
| <b>cpM</b>                     |              |              |              | .35              |
| M0                             | 320 (99.1%)  | 278 (86.9%)  | 42 (13.1%)   |                  |
| M1                             | 3 (0.9%)     | 2 (66.7%)    | 1 (33.3%)    |                  |
| NA                             | 8            | 6            | 2            |                  |
| <b>Localization</b>            |              |              |              | <b>&lt; .001</b> |
| Hypopharynx                    | 6 (1.8%)     | 4 (66.7%)    | 2 (33.3%)    |                  |
| Larynx                         | 87 (26.3%)   | 84 (96.6%)   | 3 (3.4%)     |                  |
| Oral cavity and lips           | 202 (61%)    | 186 (92.1%)  | 16 (7.9%)    |                  |
| Oropharynx                     | 36 (10.9%)   | 12 (33.3%)   | 24 (66.7%)   |                  |
| <b>L1</b>                      |              |              |              | .08              |
| absent                         | 323 (97.6%)  | 281 (87%)    | 42 (13%)     |                  |
| present                        | 8 (2.4%)     | 5 (62.5%)    | 3 (37.5%)    |                  |
| <b>Pn1</b>                     |              |              |              | .11              |
| absent                         | 264 (79.8%)  | 224 (84.8%)  | 40 (15.2%)   |                  |
| present                        | 67 (20.2%)   | 62 (92.5%)   | 5 (7.5%)     |                  |
| <b>Margin status</b>           |              |              |              | .2               |
| negative/close                 | 263 (85.9%)  | 234 (89%)    | 29 (11%)     |                  |
| positive                       | 43 (14.1%)   | 35 (81.4%)   | 8 (18.6%)    |                  |
| NA                             | 25           | 17           | 8            |                  |

**Supplemental Table S2:** Association of tumor budding (TB) with the clinicopathologic tumor characteristics in the HPV-negative subcohort of TCGA-HNSC.

| Parameter                      | TB absent  | TB weak    | TB moderate | TB strong  | P-value |
|--------------------------------|------------|------------|-------------|------------|---------|
| <b>Age</b>                     |            |            |             |            | .66     |
| <=61                           | 15 (10.5%) | 47 (32.9%) | 45 (31.5%)  | 36 (25.2%) |         |
| >61                            | 20 (14%)   | 52 (36.4%) | 39 (27.3%)  | 32 (22.4%) |         |
| <b>Gender</b>                  |            |            |             |            | .36     |
| Female                         | 12 (15.2%) | 22 (27.8%) | 27 (34.2%)  | 18 (22.8%) |         |
| Male                           | 23 (11.1%) | 77 (37.2%) | 57 (27.5%)  | 50 (24.2%) |         |
| <b>Smoking</b>                 |            |            |             |            | .52     |
| Non-Smoker                     | 10 (10.6%) | 35 (37.2%) | 31 (33%)    | 18 (19.1%) |         |
| Smoker                         | 23 (12.8%) | 59 (32.8%) | 51 (28.3%)  | 47 (26.1%) |         |
| NA                             | 2          | 5          | 2           | 3          |         |
| <b>AJCC Stage</b>              |            |            |             |            | .39     |
| Stage I                        | 2 (13.3%)  | 3 (20%)    | 5 (33.3%)   | 5 (33.3%)  |         |
| Stage II                       | 3 (7.3%)   | 18 (43.9%) | 15 (36.6%)  | 5 (12.2%)  |         |
| Stage III                      | 4 (9.8%)   | 18 (43.9%) | 9 (22%)     | 10 (24.4%) |         |
| Stage IV                       | 21 (12.4%) | 56 (33.1%) | 46 (27.2%)  | 46 (27.2%) |         |
| NA                             | 5          | 4          | 9           | 2          |         |
| <b>WHO Grade</b>               |            |            |             |            | .13     |
| G1                             | 10 (22.2%) | 15 (33.3%) | 12 (26.7%)  | 8 (17.8%)  |         |
| G2                             | 17 (9.5%)  | 67 (37.4%) | 56 (31.3%)  | 39 (21.8%) |         |
| G3                             | 8 (12.9%)  | 17 (27.4%) | 16 (25.8%)  | 21 (33.9%) |         |
| <b>WHO Subtype</b>             |            |            |             |            | .41     |
| basaloid                       | 3 (20%)    | 6 (40%)    | 4 (26.7%)   | 2 (13.3%)  |         |
| conventional                   | 31 (11.5%) | 92 (34.2%) | 80 (29.7%)  | 66 (24.5%) |         |
| papillary                      | 0 (0%)     | 1 (100%)   | 0 (0%)      | 0 (0%)     |         |
| verrucous                      | 1 (100%)   | 0 (0%)     | 0 (0%)      | 0 (0%)     |         |
| <b>Brandwein-Gensler score</b> |            |            |             |            | < .001  |
| low                            | 5 (55.6%)  | 4 (44.4%)  | 0 (0%)      | 0 (0%)     |         |
| intermediate                   | 22 (12.7%) | 63 (36.4%) | 55 (31.8%)  | 33 (19.1%) |         |
| high                           | 5 (5.9%)   | 24 (28.2%) | 23 (27.1%)  | 33 (38.8%) |         |
| NA                             | 3          | 8          | 6           | 2          |         |
| <b>pN</b>                      |            |            |             |            | .009    |
| N0                             | 17 (15.2%) | 48 (42.9%) | 29 (25.9%)  | 18 (16.1%) |         |
| N1/2/3                         | 13 (9.3%)  | 40 (28.6%) | 44 (31.4%)  | 43 (30.7%) |         |
| NA                             | 5          | 11         | 11          | 7          |         |
| <b>pT</b>                      |            |            |             |            | .19     |
| T1/T2                          | 11 (11.8%) | 26 (28%)   | 34 (36.6%)  | 22 (23.7%) |         |
| T3/T4                          | 20 (11.2%) | 69 (38.5%) | 45 (25.1%)  | 45 (25.1%) |         |
| NA                             | 4          | 4          | 5           | 1          |         |
| <b>cpM</b>                     |            |            |             |            | .38     |
| M0                             | 34 (12.2%) | 96 (34.5%) | 81 (29.1%)  | 67 (24.1%) |         |
| M1                             | 1 (50%)    | 1 (50%)    | 0 (0%)      | 0 (0%)     |         |
| NA                             | 0          | 2          | 3           | 1          |         |
| <b>Localization</b>            |            |            |             |            | .36     |
| Hypopharynx                    | 0 (0%)     | 0 (0%)     | 1 (25%)     | 3 (75%)    |         |
| Larynx                         | 15 (17.9%) | 26 (31%)   | 27 (32.1%)  | 16 (19%)   |         |
| Oral cavity and lips           | 19 (10.2%) | 68 (36.6%) | 53 (28.5%)  | 46 (24.7%) |         |
| Oropharynx                     | 1 (8.3%)   | 5 (41.7%)  | 3 (25%)     | 3 (25%)    |         |
| <b>L1</b>                      |            |            |             |            | .8      |
| absent                         | 35 (12.5%) | 96 (34.2%) | 83 (29.5%)  | 67 (23.8%) |         |
| present                        | 0 (0%)     | 3 (60%)    | 1 (20%)     | 1 (20%)    |         |
| <b>Pn1</b>                     |            |            |             |            | .37     |
| absent                         | 31 (13.8%) | 78 (34.8%) | 65 (29%)    | 50 (22.3%) |         |
| present                        | 4 (6.5%)   | 21 (33.9%) | 19 (30.6%)  | 18 (29%)   |         |
| <b>Margin status</b>           |            |            |             |            | .8      |
| negative/close                 | 27 (11.5%) | 78 (33.3%) | 72 (30.8%)  | 57 (24.4%) |         |
| positive                       | 4 (11.4%)  | 13 (37.1%) | 8 (22.9%)   | 10 (28.6%) |         |
| NA                             | 4          | 8          | 4           | 1          |         |

**Supplemental Table S3:** Association of tumor budding (TB) with the clinicopathologic tumor characteristics in the HPV-positive subcohort of TCGA-HNSC.

| Parameter                      | TB absent  | TB weak    | TB moderate | TB strong | P-value |
|--------------------------------|------------|------------|-------------|-----------|---------|
| <b>Age</b>                     |            |            |             |           | .3      |
| <=61                           | 10 (30.3%) | 16 (48.5%) | 2 (6.1%)    | 5 (15.2%) |         |
| >61                            | 6 (50%)    | 3 (25%)    | 2 (16.7%)   | 1 (8.3%)  |         |
| <b>Gender</b>                  |            |            |             |           | .25     |
| Female                         | 1 (16.7%)  | 2 (33.3%)  | 1 (16.7%)   | 2 (33.3%) |         |
| Male                           | 15 (38.5%) | 17 (43.6%) | 3 (7.7%)    | 4 (10.3%) |         |
| <b>Smoking</b>                 |            |            |             |           | .66     |
| Non-Smoker                     | 5 (31.2%)  | 8 (50%)    | 2 (12.5%)   | 1 (6.2%)  |         |
| Smoker                         | 11 (37.9%) | 11 (37.9%) | 2 (6.9%)    | 5 (17.2%) |         |
| <b>AJCC Stage</b>              |            |            |             |           | .09     |
| Stage I                        | 0 (0%)     | 0 (0%)     | 0 (0%)      | 0 (0%)    |         |
| Stage II                       | 5 (71.4%)  | 1 (14.3%)  | 0 (0%)      | 1 (14.3%) |         |
| Stage III                      | 4 (57.1%)  | 2 (28.6%)  | 1 (14.3%)   | 0 (0%)    |         |
| Stage IV                       | 4 (16.7%)  | 12 (50%)   | 3 (12.5%)   | 5 (20.8%) |         |
| NA                             | 3          | 4          | 0           | 0         |         |
| <b>WHO Grade</b>               |            |            |             |           | .76     |
| G1                             | 0 (0%)     | 1 (100%)   | 0 (0%)      | 0 (0%)    |         |
| G2                             | 7 (28%)    | 11 (44%)   | 3 (12%)     | 4 (16%)   |         |
| G3                             | 9 (47.4%)  | 7 (36.8%)  | 1 (5.3%)    | 2 (10.5%) |         |
| <b>WHO Subtype</b>             |            |            |             |           | .41     |
| basaloid                       | 5 (55.6%)  | 4 (44.4%)  | 0 (0%)      | 0 (0%)    |         |
| conventional                   | 11 (30.6%) | 15 (41.7%) | 4 (11.1%)   | 6 (16.7%) |         |
| papillary                      | 0 (0%)     | 0 (0%)     | 0 (0%)      | 0 (0%)    |         |
| verrucous                      | 0 (0%)     | 0 (0%)     | 0 (0%)      | 0 (0%)    |         |
| <b>Brandwein-Gensler score</b> |            |            |             |           | .19     |
| low                            | 3 (100%)   | 0 (0%)     | 0 (0%)      | 0 (0%)    |         |
| intermediate                   | 9 (42.9%)  | 9 (42.9%)  | 1 (4.8%)    | 2 (9.5%)  |         |
| high                           | 3 (18.8%)  | 7 (43.8%)  | 2 (12.5%)   | 4 (25%)   |         |
| NA                             | 1          | 3          | 1           | 0         |         |
| <b>pN</b>                      |            |            |             |           | .08     |
| N0                             | 6 (75%)    | 2 (25%)    | 0 (0%)      | 0 (0%)    |         |
| N1/2/3                         | 6 (23.1%)  | 11 (42.3%) | 4 (15.4%)   | 5 (19.2%) |         |
| NA                             | 4          | 6          | 0           | 1         |         |
| <b>pT</b>                      |            |            |             |           | .6      |
| T1/T2                          | 9 (40.9%)  | 7 (31.8%)  | 3 (13.6%)   | 3 (13.6%) |         |
| T3/T4                          | 4 (25%)    | 8 (50%)    | 1 (6.2%)    | 3 (18.8%) |         |
| NA                             | 3          | 4          | 0           | 0         |         |
| <b>cpM</b>                     |            |            |             |           | .21     |
| M0                             | 15 (35.7%) | 19 (45.2%) | 3 (7.1%)    | 5 (11.9%) |         |
| M1                             | 0 (0%)     | 0 (0%)     | 0 (0%)      | 1 (100%)  |         |
| NA                             | 1          | 0          | 1           | 0         |         |
| <b>Localization</b>            |            |            |             |           | .02     |
| Hypopharynx                    | 0 (0%)     | 0 (0%)     | 0 (0%)      | 2 (100%)  |         |
| Larynx                         | 2 (66.7%)  | 1 (33.3%)  | 0 (0%)      | 0 (0%)    |         |
| Oral cavity and lips           | 3 (18.8%)  | 7 (43.8%)  | 4 (25%)     | 2 (12.5%) |         |
| Oropharynx                     | 11 (45.8%) | 11 (45.8%) | 0 (0%)      | 2 (8.3%)  |         |
| <b>L1</b>                      |            |            |             |           | .36     |
| absent                         | 16 (38.1%) | 16 (38.1%) | 4 (9.5%)    | 6 (14.3%) |         |
| present                        | 0 (0%)     | 3 (100%)   | 0 (0%)      | 0 (0%)    |         |
| <b>Pn1</b>                     |            |            |             |           | .58     |
| absent                         | 15 (37.5%) | 17 (42.5%) | 3 (7.5%)    | 5 (12.5%) |         |
| present                        | 1 (20%)    | 2 (40%)    | 1 (20%)     | 1 (20%)   |         |
| <b>Margin status</b>           |            |            |             |           | .38     |
| negative/close                 | 11 (37.9%) | 9 (31%)    | 3 (10.3%)   | 6 (20.7%) |         |
| positive                       | 2 (25%)    | 5 (62.5%)  | 1 (12.5%)   | 0 (0%)    |         |
| NA                             | 3          | 5          | 0           | 0         |         |

**Supplemental Table S4:** Multivariate survival analysis of cellular dissociation grading (CDG)

including age, sex, HPV status, localization, AJCC stage, and tumor margin status.

| Endpoint   | Variable                                         | Hazard ratio | Confidence interval | P                |
|------------|--------------------------------------------------|--------------|---------------------|------------------|
| <b>PFI</b> | <b>CDG (high vs. low)</b>                        | <b>1.55</b>  | <b>1.05 to 2.28</b> | <b>.03</b>       |
|            | <b>Age (&gt;61 vs. ≤61)</b>                      | 1.03         | 0.7 to 1.52         | .87              |
|            | <b>Sex (female vs. male)</b>                     | 1.15         | 0.74 to 1.8         | .53              |
|            | <b>HPV status (pos. vs. neg.)</b>                | 1.36         | 0.69 to 2.66        | .37              |
|            | <b>Localization (oropharynx vs. other)</b>       | 0.52         | 0.21 to 1.27        | .15              |
|            | <b>AJCC stage (IV vs. I-III)</b>                 | <b>1.9</b>   | <b>1.22 to 2.93</b> | <b>.004</b>      |
|            | <b>tumor margin status (pos. vs. neg./close)</b> | <b>2.48</b>  | <b>1.57 to 3.92</b> | <b>&lt; .001</b> |
| <b>OS</b>  | <b>CDG (high vs. low)</b>                        | <b>1.74</b>  | <b>1.21 to 2.49</b> | <b>.003</b>      |
|            | <b>Age (&gt;61 vs. ≤61)</b>                      | <b>1.46</b>  | <b>1.02 to 2.08</b> | <b>.04</b>       |
|            | <b>Sex (female vs. male)</b>                     | <b>1.46</b>  | <b>1 to 2.13</b>    | <b>.05</b>       |
|            | <b>HPV status (pos. vs. neg.)</b>                | 1.67         | 0.91 to 3.07        | .1               |
|            | <b>Localization (oropharynx vs. other)</b>       | 0.82         | 0.39 to 1.75        | .61              |
|            | <b>AJCC stage (IV vs. I-III)</b>                 | <b>1.88</b>  | <b>1.27 to 2.78</b> | <b>.002</b>      |
|            | <b>tumor margin status (pos. vs. neg./close)</b> | <b>1.99</b>  | <b>1.27 to 3.13</b> | <b>.003</b>      |

**Supplemental Table S5:** Multivariate survival analysis of WHO grading including age, sex, HPV status, localization, AJCC stage, and tumor margin status.

| Endpoint   | Variable                                         | Hazard ratio | Confidence interval | P                |
|------------|--------------------------------------------------|--------------|---------------------|------------------|
| <b>PFI</b> | <b>WHO grade (G2/G3 vs. G1)</b>                  | 1.18         | 0.64 to 2.19        | .6               |
|            | <b>Age (&gt;61 vs. ≤61)</b>                      | 0.99         | 0.67 to 1.46        | 0.97             |
|            | <b>Sex (female vs. male)</b>                     | 1.17         | 0.74 to 1.83        | .5               |
|            | <b>HPV status (pos. vs. neg.)</b>                | 1.23         | 0.62 to 2.41        | .55              |
|            | <b>Localization (oropharynx vs. other)</b>       | 0.48         | 0.19 to 1.2         | .12              |
|            | <b>AJCC stage (IV vs. I-III)</b>                 | <b>1.88</b>  | <b>1.21 to 2.93</b> | <b>.005</b>      |
|            | <b>tumor margin status (pos. vs. neg./close)</b> | <b>2.37</b>  | <b>1.5 to 3.75</b>  | <b>&lt; .001</b> |
| <b>OS</b>  | <b>WHO grade (G2/G3 vs. G1)</b>                  | 1.43         | 0.81 to 2.52        | .22              |
|            | <b>Age (&gt;61 vs. ≤61)</b>                      | 1.36         | 0.96 to 1.94        | .08              |
|            | <b>Sex (female vs. male)</b>                     | 1.45         | 0.99 to 2.11        | .055             |
|            | <b>HPV status (pos. vs. neg.)</b>                | 1.43         | 0.78 to 2.62        | .25              |
|            | <b>Localization (oropharynx vs. other)</b>       | 0.75         | 0.35 to 1.61        | .47              |
|            | <b>AJCC stage (IV vs. I-III)</b>                 | <b>1.85</b>  | <b>1.25 to 2.75</b> | <b>.002</b>      |
|            | <b>tumor margin status (pos. vs. neg./close)</b> | <b>1.83</b>  | <b>1.17 to 2.88</b> | <b>.009</b>      |

**Supplemental Table S6:** Multivariate survival analysis of Brandwein-Gensler (BG) score including age, sex, HPV status, localization, AJCC stage, and tumor margin status.

| Endpoint   | Variable                                         | Hazard ratio | Confidence interval | P           |
|------------|--------------------------------------------------|--------------|---------------------|-------------|
| <b>PFI</b> | <b>BG score (high vs. low/intermediate)</b>      | 1.49         | 1 to 2.23           | .051        |
|            | <b>Age (&gt;61 vs. ≤61)</b>                      | 1            | 0.67 to 1.49        | 0.99        |
|            | <b>Sex (female vs. male)</b>                     | 1.07         | 0.67 to 1.7         | .79         |
|            | <b>HPV status (pos. vs. neg.)</b>                | 1.08         | 0.51 to 2.28        | .84         |
|            | <b>Localization (oropharynx vs. other)</b>       | 0.58         | 0.23 to 1.48        | .26         |
|            | <b>AJCC stage (IV vs. I-III)</b>                 | <b>1.63</b>  | <b>1.05 to 2.55</b> | <b>.03</b>  |
|            | <b>tumor margin status (pos. vs. neg./close)</b> | <b>2.2</b>   | <b>1.37 to 3.53</b> | <b>.001</b> |
| <b>OS</b>  | <b>BG score (high vs. low/intermediate)</b>      | <b>1.48</b>  | <b>1.03 to 2.13</b> | <b>.03</b>  |
|            | <b>Age (&gt;61 vs. ≤61)</b>                      | 1.41         | 0.98 to 2.03        | .06         |
|            | <b>Sex (female vs. male)</b>                     | 1.31         | 0.88 to 1.94        | .18         |
|            | <b>HPV status (pos. vs. neg.)</b>                | 1.6          | 0.84 to 3.04        | .15         |
|            | <b>Localization (oropharynx vs. other)</b>       | 0.74         | 0.35 to 1.6         | .45         |
|            | <b>AJCC stage (IV vs. I-III)</b>                 | <b>1.69</b>  | <b>1.14 to 2.51</b> | <b>.009</b> |
|            | <b>tumor margin status (pos. vs. neg./close)</b> | <b>1.65</b>  | <b>1.04 to 2.62</b> | <b>.03</b>  |

**Supplemental Table S7:** Multivariate survival analysis of cellular dissociation grading (CDG), WHO grading, Brandwein-Gensler (BG) score as well as age, sex, HPV status, localization, AJCC stage, and tumor margin status.

| Endpoint | Variable                                  | Hazard ratio | Confidence interval | P                |
|----------|-------------------------------------------|--------------|---------------------|------------------|
| PFI      | CDG (high vs. low)                        | 1.42         | 0.94 to 2.14        | .09              |
|          | BG score (high vs. low/intermediate)      | 1.38         | 0.91 to 2.09        | .12              |
|          | WHO grade (G2/G3 vs. G1)                  | 1.14         | 0.61 to 2.13        | .68              |
|          | Age (>61 vs. ≤61)                         | 1.04         | 0.7 to 1.55         | .85              |
|          | Sex (female vs. male)                     | 1.06         | 0.66 to 1.69        | .81              |
|          | HPV status (pos. vs. neg.)                | 1.12         | 0.53 to 2.37        | .76              |
|          | Localization (oropharynx vs. other)       | 0.65         | 0.26 to 1.65        | .36              |
|          | AJCC stage (IV vs. I-III)                 | <b>1.62</b>  | <b>1.03 to 2.54</b> | <b>.04</b>       |
|          | tumor margin status (pos. vs. neg./close) | <b>2.29</b>  | <b>1.42 to 3.69</b> | <b>&lt; .001</b> |
| OS       | CDG (high vs. low)                        | <b>1.53</b>  | <b>1.06 to 2.21</b> | <b>.02</b>       |
|          | BG score (high vs. low/intermediate)      | 1.37         | 0.95 to 1.99        | .09              |
|          | WHO grade (G2/G3 vs. G1)                  | 1.35         | 0.76 to 2.41        | .3               |
|          | Age (>61 vs. ≤61)                         | <b>1.53</b>  | <b>1.06 to 2.21</b> | <b>.02</b>       |
|          | Sex (female vs. male)                     | 1.3          | 0.88 to 1.92        | .2               |
|          | HPV status (pos. vs. neg.)                | 1.67         | 0.88 to 3.16        | .11              |
|          | Localization (oropharynx vs. other)       | 0.85         | 0.4 to 1.83         | .68              |
|          | AJCC stage (IV vs. I-III)                 | <b>1.63</b>  | <b>1.09 to 2.43</b> | <b>.02</b>       |
|          | tumor margin status (pos. vs. neg./close) | <b>1.75</b>  | <b>1.1 to 2.78</b>  | <b>.02</b>       |

**A****Overall survival (OS)**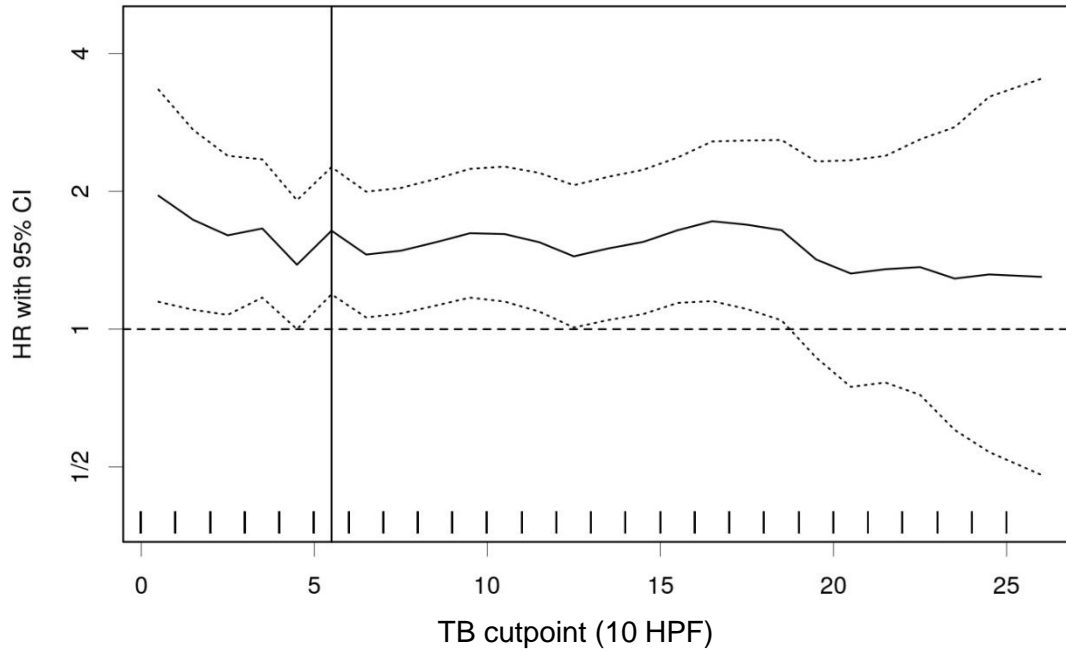**B****Progression free interval (PFI)**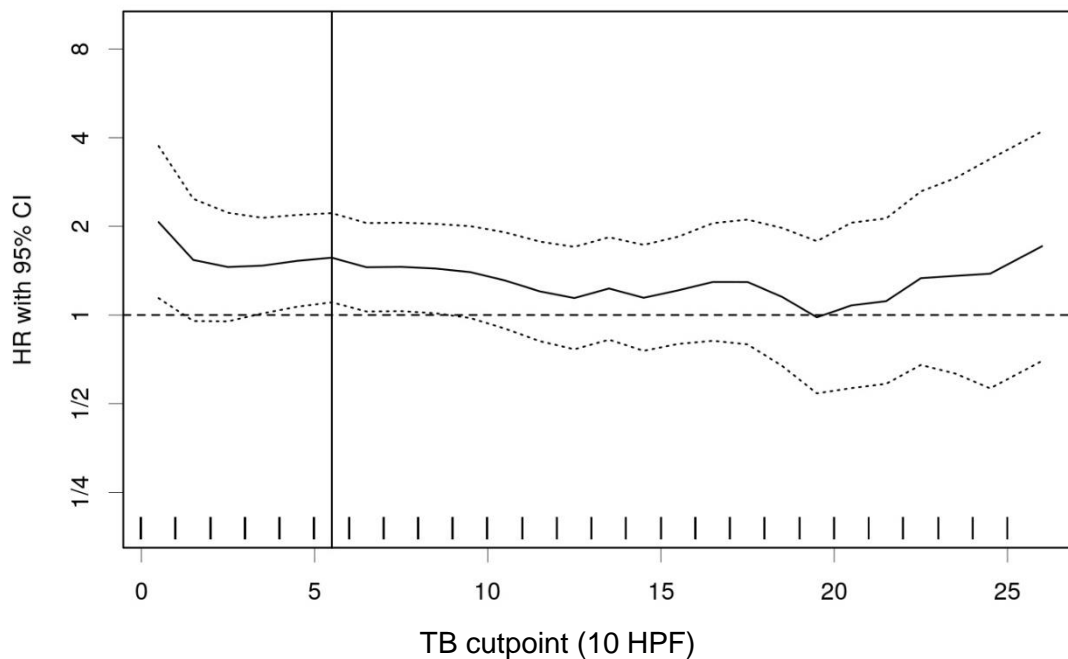

**Supplemental Figure S1:** Analysis of the prognostic significance of different TB cutpoints (1, ..., 27 budding foci). For both, OS **(A)** and PFI **(B)** the most significant difference in survival was achieved by separating tumors with  $\geq 6$  budding foci from tumors with  $< 6$  budding foci (10 HPF approach).



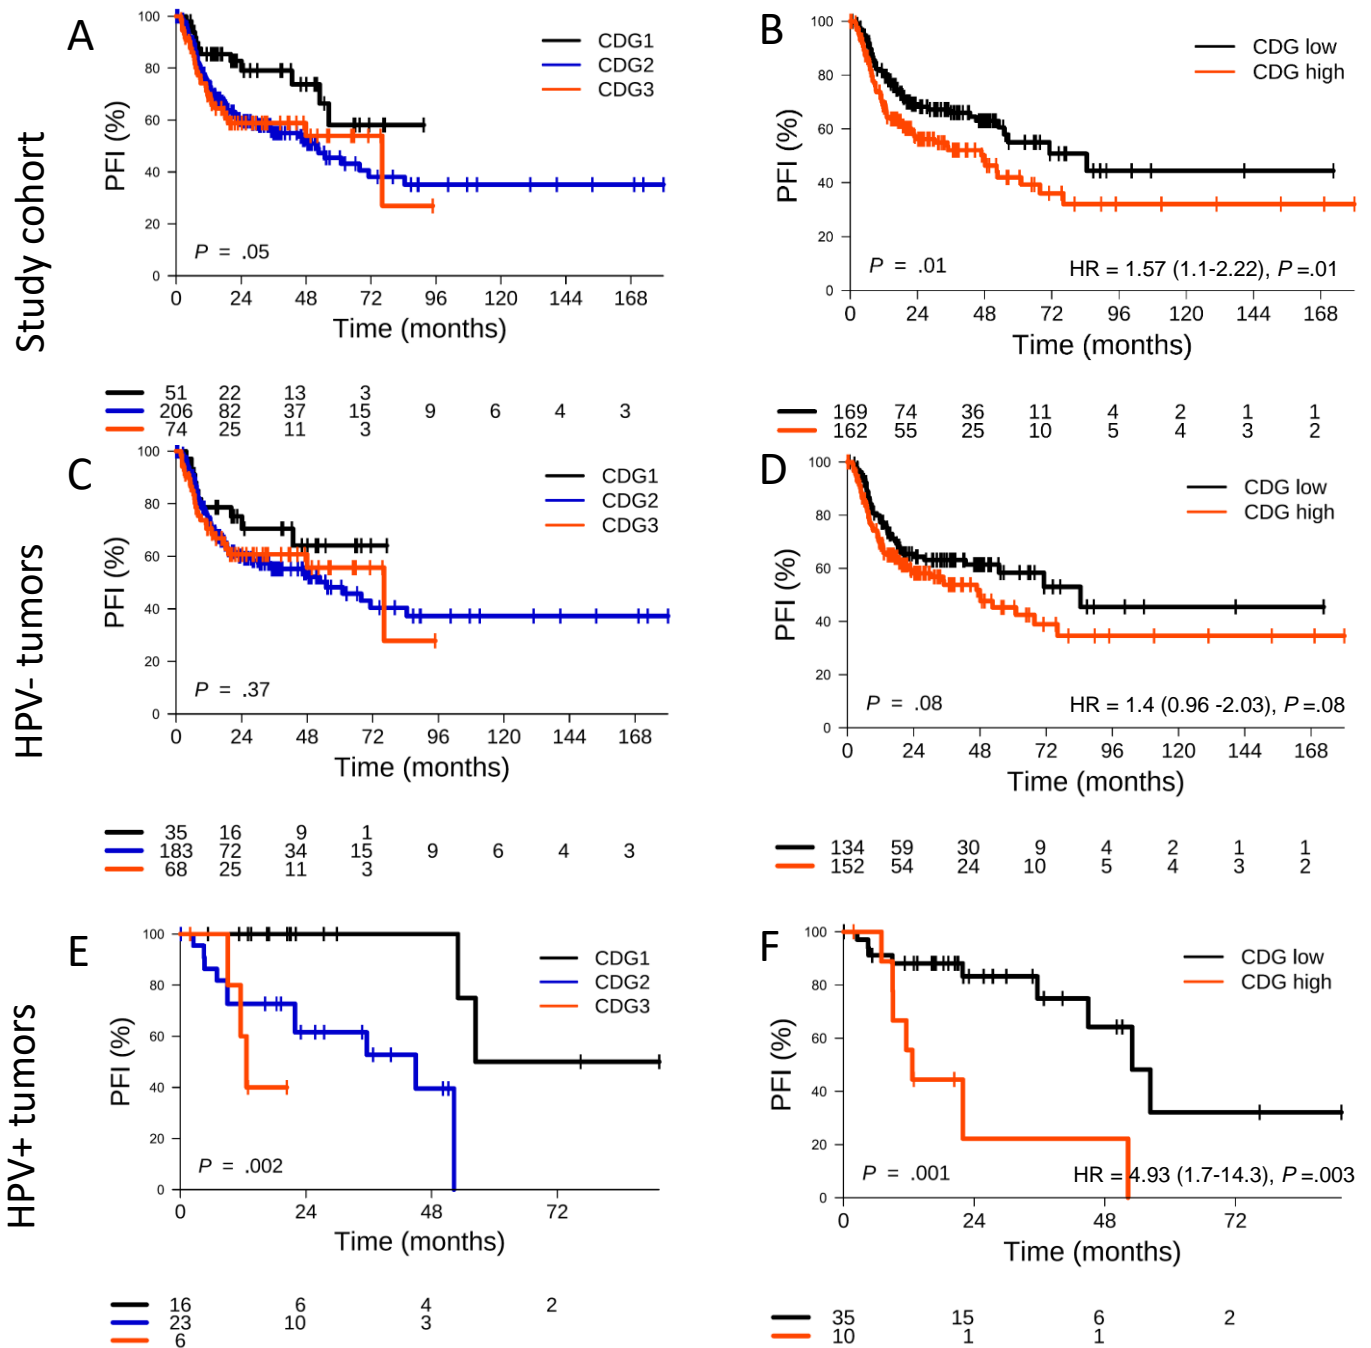

**Supplemental Figure S2: Association of progression-free interval (PFI) with cellular dissociation grading (CDG).** Performance of the 3-tiered CDG system and of the 2-tiered CDG system in the study cohort (A/B), in the subcohort of HPV-negative tumors (C/D) and in the subcohort of HPV-positive tumors (E/F).

### A: PFI

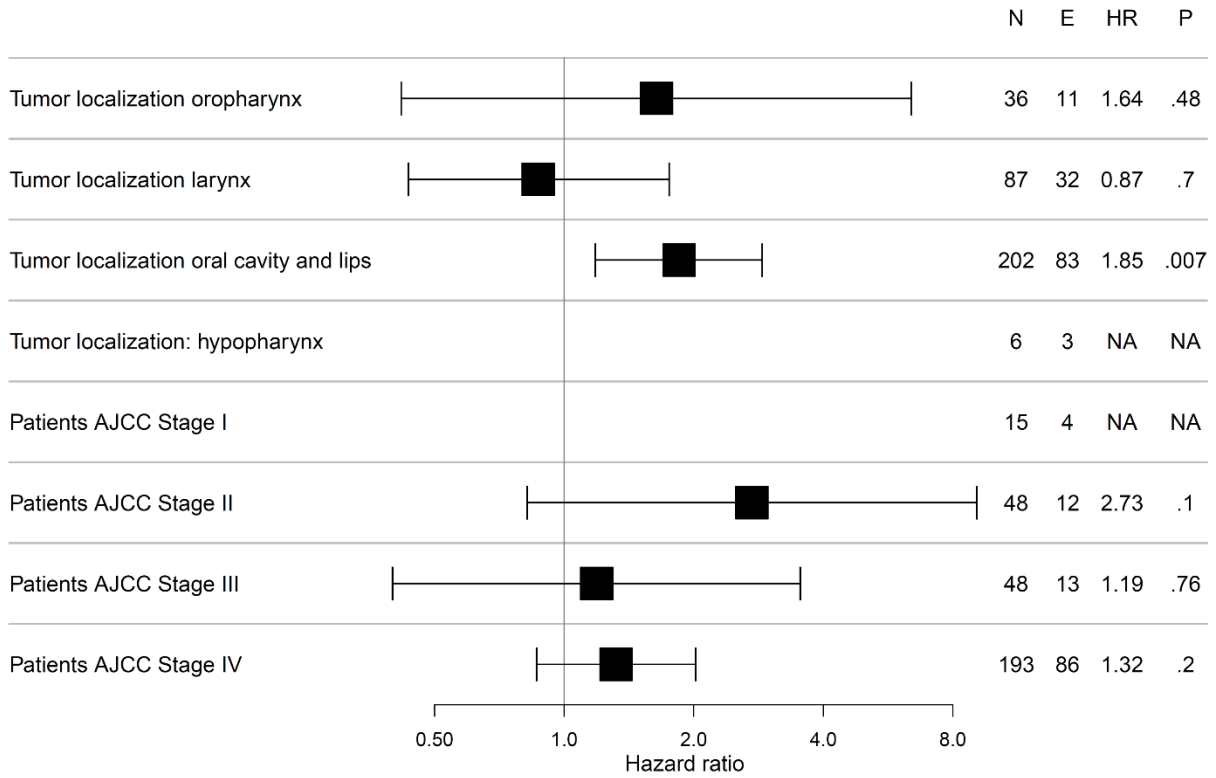

### B: OS

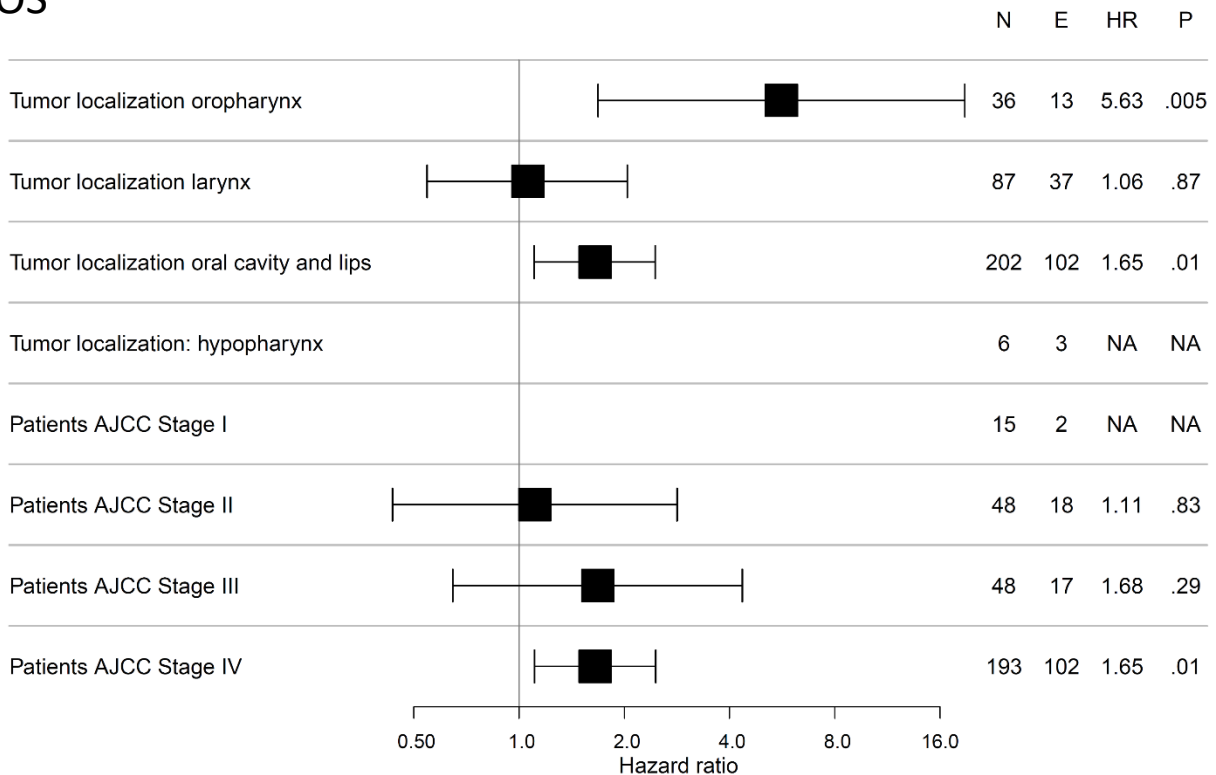

**Supplemental Figure S3: Extended subgroup analysis of the prognosticity of cellular dissociation grading (CDG).** Comparison of CDG high with CGD low tumors with respect to PFI (A) and OS (B). N = number of patients, E = number of events, HR = hazard ratio, CI = 95% confidence interval, NA = not applicable because of too few events.

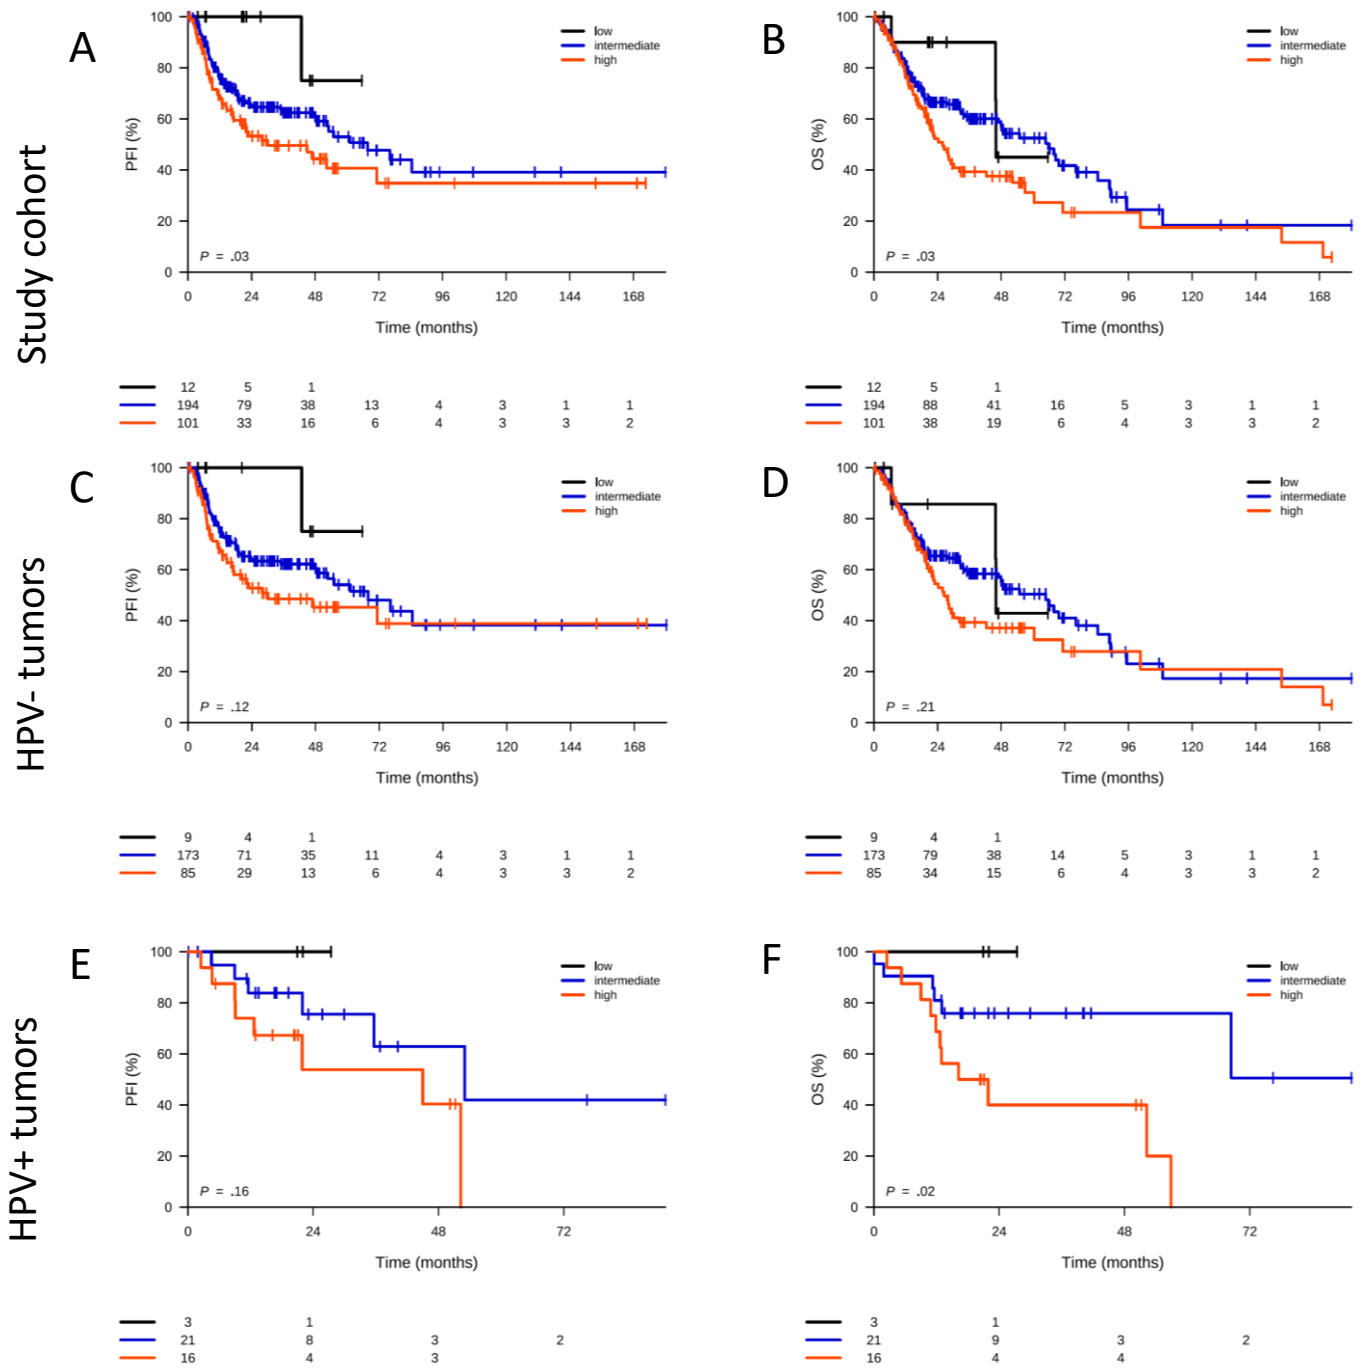

**Supplemental Figure S4: Prognostic impact of the Brandwein-Gensler (BG) score.**

Analysis of PFI and OS in the study cohort (A/B), in the subgroup of HPV-negative tumors (C/D), and in the subgroup of HPV-positive tumors (E/F).

Study cohort

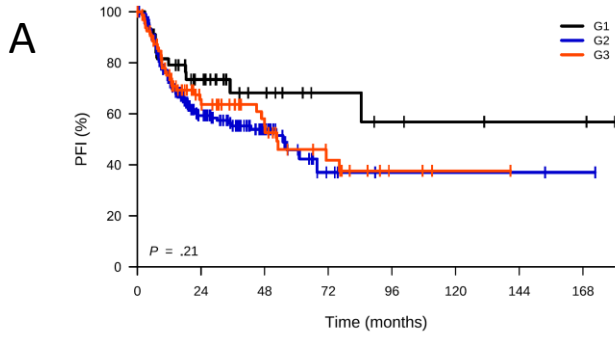

|   |     |    |    |    |   |   |   |   |
|---|-----|----|----|----|---|---|---|---|
| — | 46  | 22 | 11 | 6  | 4 | 3 | 2 | 2 |
| — | 204 | 73 | 30 | 5  | 2 | 2 | 2 | 1 |
| — | 81  | 34 | 20 | 10 | 3 | 1 |   |   |

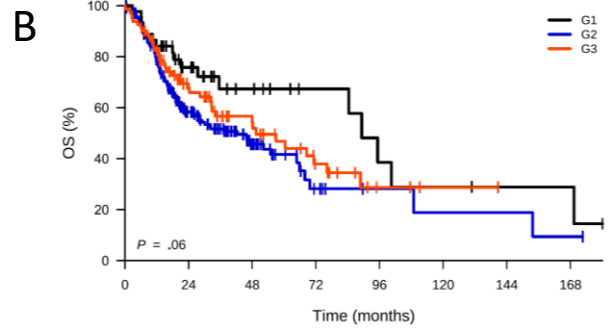

|   |     |    |    |    |   |   |   |   |
|---|-----|----|----|----|---|---|---|---|
| — | 46  | 23 | 12 | 7  | 4 | 3 | 2 | 2 |
| — | 204 | 81 | 32 | 7  | 3 | 2 | 2 | 1 |
| — | 81  | 39 | 23 | 11 | 3 | 1 |   |   |

HPV- tumors

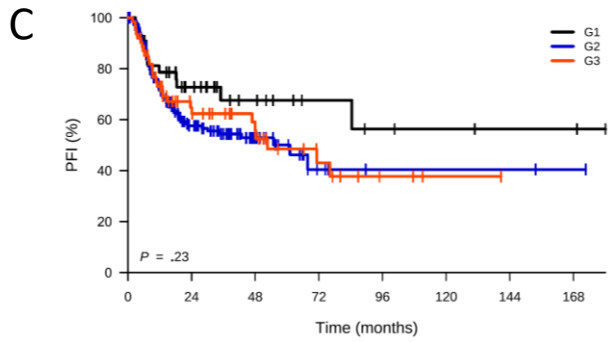

|   |     |    |    |   |   |   |   |   |
|---|-----|----|----|---|---|---|---|---|
| — | 45  | 21 | 11 | 6 | 4 | 3 | 2 | 2 |
| — | 179 | 65 | 26 | 5 | 2 | 2 | 2 | 1 |
| — | 62  | 27 | 17 | 8 | 3 | 1 |   |   |

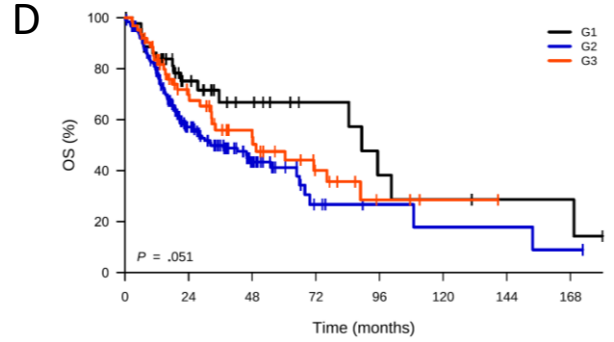

|   |     |    |    |   |   |   |   |   |
|---|-----|----|----|---|---|---|---|---|
| — | 45  | 22 | 12 | 7 | 4 | 3 | 2 | 2 |
| — | 179 | 72 | 28 | 6 | 3 | 2 | 2 | 1 |
| — | 62  | 32 | 19 | 9 | 3 | 1 |   |   |

HPV+ tumors

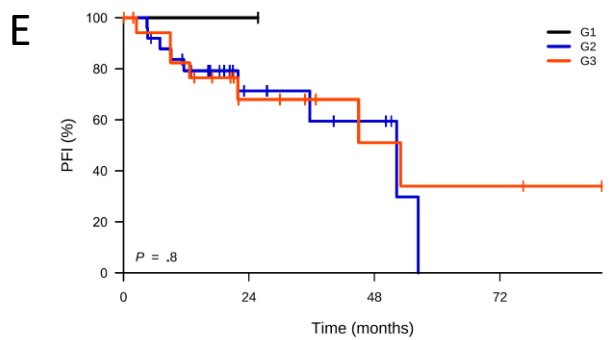

|   |    |   |   |  |  |  |  |  |
|---|----|---|---|--|--|--|--|--|
| — | 1  | 1 |   |  |  |  |  |  |
| — | 25 | 8 | 4 |  |  |  |  |  |
| — | 19 | 7 | 3 |  |  |  |  |  |

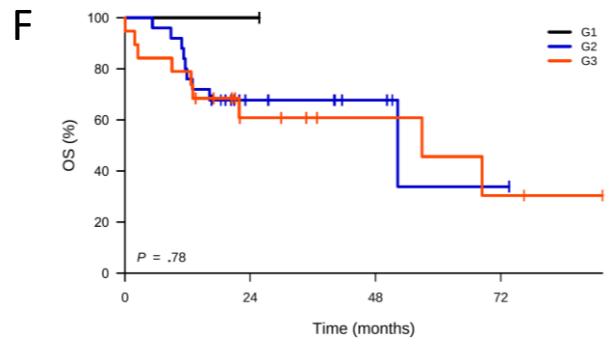

|   |    |   |   |  |  |  |  |   |
|---|----|---|---|--|--|--|--|---|
| — | 1  | 1 |   |  |  |  |  |   |
| — | 25 | 9 | 4 |  |  |  |  | 1 |
| — | 19 | 7 | 4 |  |  |  |  | 2 |

**Supplemental Figure S5: Prognostic impact of WHO grading.** Analysis of PFI and OS in the study cohort (**A/B**), in the subgroup of HPV-negative tumors (**C/D**), and in the subgroup of HPV-positive tumors (**E/F**).

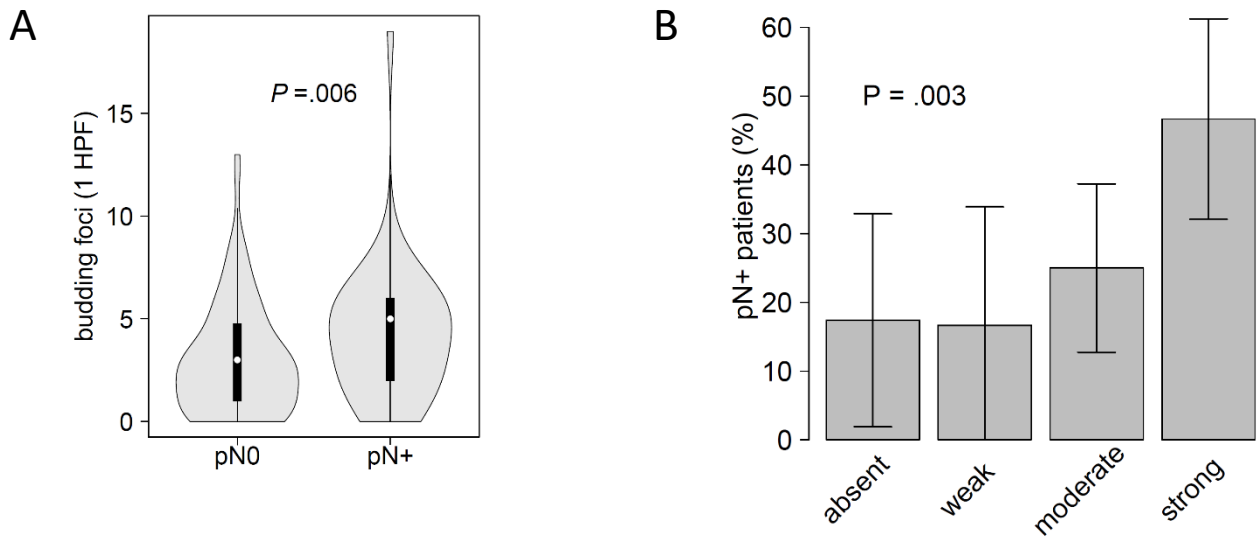

**Supplemental Figure S6: Analysis of tumor budding (TB) in 1 high-power field (HPF) of clinically nodal-negative (cN0) patients. A** Higher numbers of budding foci (1 HPF) in pathologically nodal-positive (pN+) compared to pN0 patients. **B** Increasing percentages of pN+ patients with increasing TB (1 HPF).
